# Supplementary material for: Isolation of Tulasnella spp. from Cultivated Paphiopedilum Orchids and Screening of Germination-Enhancing Fungi
Source: J Fungi (Basel). 2023 May 23;9(6):597. doi: 10.3390/jof9060597 (PMC10299374; doi:10.3390/jof9060597)
Supplement: Supplementary file 1 [file jof-09-00597-s001.zip › TableS1 Forty-four fungal isolates.xlsx]

## Sheet:  44 fungal isolates
44 fungal isolates from roots of Paphiopedilum
No.	Representative Isolate	Fungal Isolate	Orchid	Isolation Date	Stage	Accession Number	Query Length (bp)	Closest Match in GenBank	Coverage (%)	Percentage Identity (%)	Source of Closest Match Fungi	Culturable	Strain Number
1	*	parm95	P. armeniacum	20171115	vegetative growth	OQ672331	515	JQ247568	99	100	soil	Isolate	5c5_16
2		parm96	P. armeniacum	20171115	vegetative growth	OQ678391	499	JQ247568	100	100	soil	Isolate	5c5_16
3		parm11	P. armeniacum	20181123	vegetative growth	OQ678389	658	GQ241853	98	99.39	P. armeniacum	Uncultured	PA273
4	*	parm31	P. armeniacum	20181123	vegetative growth	OQ678371	663	GQ241853	98	99.39	P. armeniacum	Uncultured	PA273
5	*	parm382	P. armeniacum	20181130	flowering	OQ678373	608	GQ241853	100	98.69	P. armeniacum	Uncultured	PA273
6		parmf25	P. armeniacum	20180820	flowering	OQ678392	525	GQ241854	100	99.81	P. armeniacum	Uncultured	PA283
7		parmf42	P. armeniacum	20180820	flowering	OQ678393	642	GQ241854	99	99.53	P. armeniacum	Uncultured	PA283
8	*	parmf59	P. armeniacum	20180820	flowering	OQ678372	595	GQ241854	100	100	P. armeniacum	Uncultured	PA283
9	*	parm451	P. armeniacum	20181130	flowering	OQ678390	613	GQ241817	99	99.51	P. micranthum	Uncultured	PM510
10	*	parmf61	P. armeniacum	20190405	flowering	OQ672383	501	KX387616	100	99.6	P. hirsutissimum	Uncultured	R-4
11		parmf612	P. armeniacum	20190405	flowering	OQ672385	501	KX387616	100	99.4	P. hirsutissimum	Uncultured	R-4
12		parmf72	P. armeniacum	20190405	flowering	OQ678394	501	KX387616	100	99.4	P. hirsutissimum	Uncultured	R-4
13	*	parm152	P. armeniacum	20181130	flowering	OQ672311	505	MN918479	100	100	NA	Isolate	TP-5
14	*	parm712	P. armeniacum	20190405	vegetative growth	OQ678395	505	KF537647	100	99.01	Liparis japonica	Isolate	XC-2015
15		pcal42	P. callosum	20180327	vegetative growth	OQ678397	550	GU166421	100	99.82	P. villosum	Isolate	Pv-PC-1-1
16	*	Php18	P. callosum	20180327	vegetative growth	MW221315	545	GU166421	100	99.82	P. villosum	Isolate	Pv-PC-1-1
17	*	pemer202	P. emersonii	20200110	flowering	OQ678398	611	OP740400	98	100	Habenaria longicornu	Isolate	TCA4
18	*	pgrat61	P. gratrixianum	20190222	vegetative growth	OQ678359	599	FJ940903	98	96.64	Pecteilis susannae	Isolate	AUG 031
19	*	pgrat632	P. gratrixianum	20210504	vegetative growth	OQ678357	586	GQ241842	98	98.96	P. dianthum	Uncultured	PD570
20	*	pgrat15	P. gratrixianum	20210504	vegetative growth	OQ678358	605	EF393621	98	98.99	Cymbidium floribundum	Isolate	Shen CF07
21	*	Php25	P. henryanum	20180508	vegetative growth	MW221330	515	KX387600	100	99.81	P. dianthum	Uncultured	R-30(a)
22	*	phir882	P. hirsutissimum	20200110	vegetative growth	OQ678360	567	GU166423	95	99.45	Cymbidium Golden Elf×Grammatophyllum measuresianum	Isolate	C3-DT-TC-2
23	*	Php12	P. hirsutissimum	20180822	fruiting	MT804628	565	OQ148693	100	98.94	Dendrobium flexicaule	Isolate	Dfrc_2
24		pjack31	P. malipoense	20180327	vegetative growth	OQ678399	573	GQ241829	100	99.65	P. micranthum	Uncultured	PM186
25	*	pjack49	P. malipoense	20180327	vegetative growth	OQ678361	650	GQ241829	98	98.76	P. micranthum	Uncultured	PM186
26		pmi13	P. micranthum	20180106	vegetative growth	OQ678400	520	OL638255	100	100	Cymbidium goeringii	Isolate	Cym1
27	*	pmir712	P. micranthum	20190405	vegetative growth	OQ678364	545	OL638255	99	98.15	Cymbidium goeringii	Isolate	Cym1
28		Php134	P. micranthum	20180106	vegetative growth	MW227242	611	GQ241818	100	99.51	P. micranthum	Uncultured	PM406
29	*	pmi16	P. micranthum	20180106	flowering	OQ678362	551	GQ241818	100	99.82	P. micranthum	Uncultured	PM406
30	*	pmir45	P. micranthum	20190405	vegetative growth	OQ678402	598	GQ241818	99	97.47	P. micranthum	Uncultured	PM406
31	*	pmilg281	P. micranthum	20181012	vegetative growth	OQ678363	612	GQ241857	98	98.05	P. micranthum	Uncultured	PM424
32		pmig12	P. micranthum	20181123	vegetative growth	OQ678401	549	GQ241857	100	98.91	P. micranthum	Uncultured	PM424
33	*	ppur922	P. purpuratum	20170922	flowering	OQ678365	533	GU166424	100	97	P. callosum	Isolate	Pca-QS-0-1
34		ppur45	P. purpuratum	20180323	flowering	OQ678403	579	GU166424	98	96.86	P. callosum	Isolate	Pca-QS-0-1
35	*	ptigf131	P. tigrinum	20190405	fruiting	OQ678368	518	KC478574	100	97.34	Phragmipedium longifolium	Uncultured	PH8R3
36		ptigf132	P. tigrinum	20190405	fruiting	OQ678404	449	KC478574	100	97.16	Phragmipedium longifolium	Uncultured	PH8R3
37	*	pbs1191	P. villosum	20201109	vegetative growth	OQ678396	617	GU166415	95	99.66	P. charlesworthii	Isolate	Pch-QS-0-2
38	*	pwar310	P. wardii	20180416	vegetative growth	OQ678369	559	MW432189	100	99.82	Dendrobium officinale	Isolate	B-19
39		pwar55	P. wardii	20180416	vegetative growth	OQ678405	542	MW432189	100	99.82	Dendrobium officinale	Isolate	B-19
40	*	pwar205	P. wardii	20200110	vegetative growth	OQ678406	604	AJ313448	98	99.16	Oncidium varimyce x Oncidium nona Gomesa Millennium Gold	Isolate	Onv4.2
41	*	pwen31	P. wenshanense	20190222	vegetative growth	OQ678370	654	GQ241830	97	99.53	P. micranthum	Uncultured	PM15
42		pwen421	P. wenshanense	20190222	vegetative growth	OQ678407	651	GQ241830	97	99.68	P. micranthum	Uncultured	PM15
43	*	prhi68	P.rhizomatosum	20180416	vegetative growth	OQ678367	560	GQ241830	100	99.64	P. micranthum	Uncultured	PM15
44	*	prhi65	P.rhizomatosum	20180416	vegetative growth	OQ678366	556	KX387600	100	99.64	P. dianthum	Uncultured	R-30(a)
* : Representative Isolate
NA: No separation information
Source of Closest Match Fungi: Except for special annotations, the fungal sequences are from the root of orchids.
