# Supplementary material for: Isolation of Tulasnella spp. from Cultivated Paphiopedilum Orchids and Screening of Germination-Enhancing Fungi
Source: J Fungi (Basel). 2023 May 23;9(6):597. doi: 10.3390/jof9060597 (PMC10299374; doi:10.3390/jof9060597)
Supplement: Supplementary file 1 [file jof-09-00597-s001.zip › TableS2 Thirty-three published Tulasnella spp.xlsx]

## Sheet: 33 published Tulasnella spp.
No.	Specie	GenBank Accession No.	Reference
1	Tulasnella albida	AY373294	McCormick, M.K.; Whigham, D.F.; O’Neill, J. Mycorrhizal diversity in photosynthetic terrestrial orchids. New Phytol, 2004, 163, 425–438.
2	Tulasnella asymmetrica	MH134544	Reiter, N.; Lawrie, A.C.; Linde, C.C. Matching symbiotic associations of an endangered orchid to habitat to improve conservation outcomes. Annals of Botany, 2018, 122(6):947-959
3	Tulasnella australiensis	MT003730	Arifin, A.R.; May, T.W.; Linde, C.C. New species of Tulasnella associated with Australian terrestrial orchids in the Cryptostylidinae and Drakaeinae. Mycologia, 2020, 113, 212–230.
4	Tulasnella bifrons	AY373290	McCormick, M.K.; Whigham, D.F.; O’Neill, J. Mycorrhizal diversity in photosynthetic terrestrial orchids. New Phytol, 2004, 163, 425–438.
5	Tulasnella calospora	DQ388043	Suárez, J.P.; Weiß, M.; Abele, A.; Garnica, S.; Oberwinkler, F.; Kottke, I. Diverse tulasnelloid fungi form mycorrhizas with epiphytic orchids in an Andean cloud forest. Mycological Research. 2006, 110, 1257-1270.
6	Tulasnella calospora	DQ388044	Suárez, J.P.; Weiß, M.; Abele, A.; Garnica, S.; Oberwinkler, F.; Kottke, I. Diverse tulasnelloid fungi form mycorrhizas with epiphytic orchids in an Andean cloud forest. Mycological Research. 2006, 110, 1257-1270.
7	Tulasnella calospora	KC796458	Freitas, E.F.S.; Silva, M.D.; Cruz E.D.S.; Mangaravite, E.; Bocayuva, M.F.; Veloso, T.G.R.; Selosse, M.A.; Kasuya, M.C.M. Diversity of mycorrhizal Tulasnella associated with epiphytic and rupicolous orchids from the Brazilian Atlantic Forest, including four new species. Sci. Rep. 2020, 10, 7069.
8	Tulasnella concentrica	MT036547	Arifin, A.R.; May, T.W.; Linde, C.C. New species of Tulasnella associated with Australian terrestrial orchids in the Cryptostylidinae and Drakaeinae. Mycologia, 2020, 113, 212–230.
9	Tulasnella cumulopuntioides	LC175326	Fujimori, S.; Abe, J. P.; Okane, I.; Yamaoka, Y. Three new species in the genus Tulasnella isolated from orchid mycorrhiza of Spiranthes sinensis var. amoena (Orchidaceae). Mycoscience 2019, 60, 71–81.
10	Tulasnella danica	AY373297	McCormick, M.K.; Whigham, D.F.; O’Neill, J. Mycorrhizal diversity in photosynthetic terrestrial orchids. New Phytol, 2004, 163, 425–438.
11	Tulasnella deliquescens	AY373291	McCormick, M.K.; Whigham, D.F.; O’Neill, J. Mycorrhizal diversity in photosynthetic terrestrial orchids. New Phytol, 2004, 163, 425–438.
12	Tulasnella deliquescens	LC175329	Fujimori, S.; Abe, J. P.; Okane, I.; Yamaoka, Y. Three new species in the genus Tulasnella isolated from orchid mycorrhiza of Spiranthes sinensis var. amoena (Orchidaceae). Mycoscience 2019, 60, 71–81.
13	Tulasnella dendritica	LC175308	Fujimori, S.; Abe, J. P.; Okane, I.; Yamaoka, Y. Three new species in the genus Tulasnella isolated from orchid mycorrhiza of Spiranthes sinensis var. amoena (Orchidaceae). Mycoscience 2019, 60, 71–81.
14	Tulasnella densa	MT036520	Arifin, A.R.; May, T.W.; Linde, C.C. New species of Tulasnella associated with Australian terrestrial orchids in the Cryptostylidinae and Drakaeinae. Mycologia, 2020, 113, 212–230.
15	Tulasnella eichleriana	KC152381	Cruz, D.; Suárez, J.P.; Kottke, I.; Piepenbring, M. Cryptic species revealed by molecular phylogenetic analysis of sequences obtained from basidiomata of Tulasnella. Mycologia, 2014, 106, 708-722.
16	Tulasnella ellipsoidea	LC175316	Fujimori, S.; Abe, J. P.; Okane, I.; Yamaoka, Y. Three new species in the genus Tulasnella isolated from orchid mycorrhiza of Spiranthes sinensis var. amoena (Orchidaceae). Mycoscience 2019, 60, 71–81.
17	Tulasnella eremophila	KJ701188	Direct Submission
18	Tulasnella hadrolaeliae	MN385726	Freitas, E.F.S.; Silva, M.D.; Cruz E.D.S.; Mangaravite, E.; Bocayuva, M.F.; Veloso, T.G.R.; Selosse, M.A.; Kasuya, M.C.M. Diversity of mycorrhizal Tulasnella associated with epiphytic and rupicolous orchids from the Brazilian Atlantic Forest, including four new species. Sci. Rep. 2020, 10, 7069.
19	Tulasnella helicospora	MT489316	Calevo, J.; Voyron, S.; Ercole, E.; Girlanda, M. Is the Distribution of Two Rare Orchis Sister Species Limited by Their Main Mycobiont? Diversity 2020, 12, 262.
20	Tulasnella irregularis	EU218889	Taylor, D.L.; Mccormick, M.K. Internal transcribed spacer primers and sequences for improved characterization of basidiomycetous orchid mycorrhizas. New Phytologist. New Phytologist. 2008, 177: 1020–1033
21	Tulasnella occidentalis	MT008096	Arifin, A.R.; May, T.W.; Linde, C.C. New species of Tulasnella associated with Australian terrestrial orchids in the Cryptostylidinae and Drakaeinae. Mycologia, 2020, 113, 212–230.
22	Tulasnella orchidis	MN385729	Freitas, E.F.S.; Silva, M.D.; Cruz E.D.S.; Mangaravite, E.; Bocayuva, M.F.; Veloso, T.G.R.; Selosse, M.A.; Kasuya, M.C.M. Diversity of mycorrhizal Tulasnella associated with epiphytic and rupicolous orchids from the Brazilian Atlantic Forest, including four new species. Sci. Rep. 2020, 10, 7069.
23	Tulasnella pruinosa	AY373295	McCormick, M.K.; Whigham, D.F.; O’Neill, J. Mycorrhizal diversity in photosynthetic terrestrial orchids. New Phytol, 2004, 163, 425–438.
24	Tulasnella punctata	MT008122	Arifin, A.R.; May, T.W.; Linde, C.C. New species of Tulasnella associated with Australian terrestrial orchids in the Cryptostylidinae and Drakaeinae. Mycologia, 2020, 113, 212–230.
25	Tulasnella rosea	MN947569	Arifin, A.R.; May, T.W.; Linde, C.C. New species of Tulasnella associated with Australian terrestrial orchids in the Cryptostylidinae and Drakaeinae. Mycologia, 2020, 113, 212–230.
26	Tulasnella sphagneti	KY095117	Linde, C.C.; May, T.W.; Phillips, R.D.; Ruibal, M.; Smith, L.M.; Rod Peakall, R. New species of Tulasnella associated with terrestrial orchids in Australia. IMA Fungus, 2017, 8, 27–47.
27	Tulasnella tomaculum	AY373296	McCormick, M.K.; Whigham, D.F.; O’Neill, J. Mycorrhizal diversity in photosynthetic terrestrial orchids. New Phytol, 2004, 163, 425–438.
28	Tulasnella violea	AY373303	McCormick, M.K.; Whigham, D.F.; O’Neill, J. Mycorrhizal diversity in photosynthetic terrestrial orchids. New Phytol, 2004, 163, 425–438.
29	Tulasnella violea	KC152422	Cruz, D.; Suárez, J.P.; Kottke, I.; Piepenbring, M. Cryptic species revealed by molecular phylogenetic analysis of sequences obtained from basidiomata of Tulasnella. Mycologia, 2014, 106, 708-722.
30	Tulasnella zygopetali	MN385732	Freitas, E.F.S.; Silva, M.D.; Cruz E.D.S.; Mangaravite, E.; Bocayuva, M.F.; Veloso, T.G.R.; Selosse, M.A.; Kasuya, M.C.M. Diversity of mycorrhizal Tulasnella associated with epiphytic and rupicolous orchids from the Brazilian Atlantic Forest, including four new species. Sci. Rep. 2020, 10, 7069.
31	Epulorhiza amonilioides	JF907600	Almeida, P.R.M.; Vandenberg, C.; Góes­Neto, A. Epulorhiza amonilioides sp. nov.: a new anamorphic species of orchid mycorrhiza from Brazil. Neodiversity. 2014, 7, 1–10.
32	Epulorhiza anaticula	EU218891	Taylor, D.L.; Mccormick, M.K. Internal transcribed spacer primers and sequences for improved characterization of basidiomycetous orchid mycorrhizas. New Phytologist. New Phytologist. 2008, 177: 1020–1033
33	Epulorhiza epiphytica	JF907598	Almeida, P.R.M.; Vandenberg, C.; Góes­Neto, A. Epulorhiza amonilioides sp. nov.: a new anamorphic species of orchid mycorrhiza from Brazil. Neodiversity. 2014, 7, 1–10.
34	Botryobasidium botryosum	DQ267124	Freitas, E.F.S.; Silva, M.D.; Cruz E.D.S.; Mangaravite, E.; Bocayuva, M.F.; Veloso, T.G.R.; Selosse, M.A.; Kasuya, M.C.M. Diversity of mycorrhizal Tulasnella associated with epiphytic and rupicolous orchids from the Brazilian Atlantic Forest, including four new species. Sci. Rep. 2020, 10, 7069.
